# Supplementary material for: Endogenous oligomer formation underlies DVL2 condensates and promotes Wnt/β-catenin signaling
Source: eLife. 2024 Dec 9;13:RP96841. doi: 10.7554/eLife.96841 (PMC11627551; doi:10.7554/eLife.96841)
Supplement: Figure 1—source data 1. [file elife-96841-fig1-data1.xlsx]

## Sheet: Tabelle1
	Panel D
			Exp 1	Exp 2	Exp 3
		DVL2	82.6506	65.1491	86.1417
		DVL1	34.5511	27.1805	16.7064
		DVL3	28.4756	13.1649	36.8006
		DVL2 M2	68.0027	59.1373	78.4225
