# Supplementary material for: Endogenous oligomer formation underlies DVL2 condensates and promotes Wnt/β-catenin signaling
Source: eLife. 2024 Dec 9;13:RP96841. doi: 10.7554/eLife.96841 (PMC11627551; doi:10.7554/eLife.96841)
Supplement: Figure 2—source data 1. [file elife-96841-fig2-data1.xlsx]

## Sheet: Tabelle1
	Panel C
			Exp 1	Exp 2	Exp 3
		DVL2	87.3568	93.9132	87.6195
		DDEP	48.5173	44.5613	49.9411
		1-418	9.88325	17.0391	6.7052
	Panel E
			Exp 1	Exp 2	Exp 3	Exp 4
	U2OS	DVL2	98	92.3333	98.3333	94.3333
		DDEP	72.3333	62.3333	75.6667	72.6667
		1-418	9	9.33333	4.66667	4.66667
	HeLa	DVL2	94	98	98	95.3333
		DDEP	87	90.6667	77.6667	84
		1-418	10.3333	14	11	19.6667
	Panel F
			Exp 1	Exp 2	Exp 3	Exp 4	Exp 5	Exp 6
		-	6.53498	12.6279	7.21211	16.1003	7.05466	12.8794
		DVL2	100	100	100	100	100	100
		DDEP	40.4651	41.9268	42.037	58.0761	25.8803	60.7224
		1-418	16.3998	23.2521	13.3685	22.7176	7.16624	26.2706
