# Supplementary material for: Endogenous oligomer formation underlies DVL2 condensates and promotes Wnt/β-catenin signaling
Source: eLife. 2024 Dec 9;13:RP96841. doi: 10.7554/eLife.96841 (PMC11627551; doi:10.7554/eLife.96841)
Supplement: Figure 3—source data 1. [file elife-96841-fig3-data1.xlsx]

## Sheet: Tabelle1
	Panel C
			Exp 1	Exp 2	Exp 3	Exp 4
		DDEP	86.6667	90	77.6667	85
		DDEP-DCFR	14.6667	34	11.6667	28
		1-418	16.6667	16	4	16.3333
		1-418+CFR	94	91.6667	75	91.3333
	Panel D
			Exp 1	Exp 2	Exp 3	Exp 4
		DDEP	13	19	32	11
			17	28	34	14
			25	49	36	14
			36	55	37	20
			42	62	49	51
			46	64	49	58
			46	74	68	72
			52	86	88	74
			56	86	91	74
			94	105	97	82
		DDEP-DCFR	0	3	0	0
			0	3	0	0
			0	6	1	1
			0	9	2	6
			0	13	5	7
			0	22	7	9
			1	24	9	14
			3	27	11	15
			6	36	18	19
			12	48	21	39
		1-418	0	0	0	0
			0	0	0	0
			0	0	0	0
			0	0	0	0
			0	3	0	0
			2	4	0	0
			2	7	0	0
			14	10	2	1
			14	15	2	6
			45	36	17	29
		1-418+CFR	26	8	10	15
			26	26	16	26
			38	31	19	34
			41	31	23	39
			42	46	34	39
			46	52	38	46
			47	60	40	52
			56	73	42	61
			61	75	49	77
			70	83	51	78
	Panel E
			Exp 1	Exp 2	Exp 3	Exp 4
		DDEP	50.5495	45.3826	29.7976	38.8855
		DDEP-DCFR	18.6813	15.6992	11.0956	8.05572
		1-418	11.0551	24.6875	21.4272	15.0075
		1-418+CFR	43.9008	56.5256	33.1936	40.205
