# Supplementary material for: Endogenous oligomer formation underlies DVL2 condensates and promotes Wnt/β-catenin signaling
Source: eLife. 2024 Dec 9;13:RP96841. doi: 10.7554/eLife.96841 (PMC11627551; doi:10.7554/eLife.96841)
Supplement: Figure 4—source data 1. [file elife-96841-fig4-data1.xlsx]

## Sheet: Tabelle1
	Panel B
			Exp 1	Exp 2	Exp 3
		DDEP	48.6834	37.0192	40.8752
		DDEP-DLCR4	31.6717	17.9314	26.6273
		DDEP-DCD2	38.5868	32.7069	43.8189
		DDEP-DCFR	29.8644	18.6184	24.5248
	Panel D
			Exp 1	Exp 2	Exp 3
		1-418	4.73064	8.95361	23.8913
		1-418+LCR4	27.8933	43.8636	43.7852
		1-418+CD2	11.1939	16.1216	14.0109
		1-418+CFR	21.1875	19.9749	35.1292
	Panel F
			Exp 1	Exp 2	Exp 3
		DVL1	10.5612	17.1397	19.0047
		DVL1-CFRDVL2	37.4067	41.4862	38.8124
