# Supplementary material for: Endogenous oligomer formation underlies DVL2 condensates and promotes Wnt/β-catenin signaling
Source: eLife. 2024 Dec 9;13:RP96841. doi: 10.7554/eLife.96841 (PMC11627551; doi:10.7554/eLife.96841)
Supplement: Figure 5—source data 1. [file elife-96841-fig5-data1.xlsx]

## Sheet: Tabelle1
	Panel C
			Exp 1	Exp 2	Exp 3	Exp 4
		DDEP	72.6667	70.6667	69	76.3333
		DDEP VV-AA	42.3333	35.6667	42.3333	49.3333
		DDEP-DLCR4	37.6667	38	41	47.6667
		DDEP FF-AA	24.6667	31.3333	33	44.6667
		DDEP-DCD2	25.6667	30.6667	34.3333	40.3333
	Panel E
			Exp 1	Exp 2	Exp 3	Exp 4
		CFR	63.3333	95	78.3333	71.6667
		VV-AA FF-AA	28.3333	33.3333	20	13.3333
	Panel F
				Exp 1	Exp 2	Exp 3	Exp 4	Exp 5
		DVL2	-	100	100	100	100	100
		DVL2	CFR 20 ng	64.9573	67.5676	74.1935	68.254	40.7692
		DVL2	FF-AA 20 ng			88.7097	71.0317	63.5385
		DVL2	CFR 200 ng	19.2308	22.0721	36.2903	37.6984	28.9231
		DVL2	FF-AA 200 ng			60.0806	55.1587	52.6154
