# Supplementary material for: Endogenous oligomer formation underlies DVL2 condensates and promotes Wnt/β-catenin signaling
Source: eLife. 2024 Dec 9;13:RP96841. doi: 10.7554/eLife.96841 (PMC11627551; doi:10.7554/eLife.96841)
Supplement: Figure 6—source data 1. [file elife-96841-fig6-data1.xlsx]

## Sheet: Tabelle1
	Panel B
				Exp 1	Exp 2	Exp 3	Exp 4
		DVL2	-	96	96.6667	98	99.6667
			O.s.	9	8.33333	17.6667	7.33333
			1,6-Hex	66.3333	65.6667	75.3333	66.6667
		1-418+CFR	-	95.6667	97.3333	99.6667	98.3333
			O.s.	25	24.3333	47.3333	23
			1,6-Hex	66.6667	61	80.3333	70.6667
		DIX+CFR	-	61	70.6667	88	79.3333
			O.s.	32.6667	29	51.6667	35
			1,6-Hex	34.6667	37.6667	63.6667	52.3333
	Panel F
			Exp 1	Exp 2	Exp 3	Exp 4
		DDEP	79.6667	80	73	72
		DDEP-DCFR	18	25.6667	22.3333	13.3333
		DDEP-DCFR+CFRAX	60.3333	66.3333	58	42.3333
	Panel G
			Exp 1	Exp 2	Exp 3	Exp 4
		DDEP	48.7179	59.2593	54.3478	62.1622
		DDEP-DCFR	29.4872	30.8642	32.6087	37.8378
		DDEP-DCFR+CFRAX	48.7179	43.2099	43.4783	54.0541
