# Supplementary material for: Endogenous oligomer formation underlies DVL2 condensates and promotes Wnt/β-catenin signaling
Source: eLife. 2024 Dec 9;13:RP96841. doi: 10.7554/eLife.96841 (PMC11627551; doi:10.7554/eLife.96841)
Supplement: Figure 7—source data 1. [file elife-96841-fig7-data1.xlsx]

## Sheet: Tabelle1
	Panel B
				Exp 1	Exp 2	Exp 3
		Large	DVL2	76.6561	80.7362	76.5908
			DCFR	58.3027	63.9108	53.1286
			VV/FF	60.1369	60.5415	57.9871
		Medium + Small	DVL2	23.3439	19.2638	23.4092
			DCFR	41.6973	36.0892	46.8714
			VV/FF	39.8631	39.4585	42.0129
	Panel D
			Exp 1	Exp 2	Exp 3	Exp 4
		DVL2	89	92.6667	92.6667	96.3333
		DCFR	63.6667	42	45	53.3333
		VV-AA FF-AA	45	48	38.3333	51.6667
		M2	6	19.3333	5.66667	12.6667
	Panel E
			Exp 1	Exp 2	Exp 3	Exp 4
		-	7.25806	7.74648	6.17284	8.97436
		DVL2	100	100	100	100
		DCFR	70.1613	72.5352	41.9753	65.3846
		VV-AA FF-AA	52.4194	52.8169	30.8642	50.641
		M2	17.7419	16.1972	17.9012	23.7179
	Panel F
			Exp 1	Exp 2	Exp 3	Exp 4
		-	46.3415	39.0625	35.7143	46.2783
		DVL2	100	100	100	100
		DCFR	76.8293	64.8438	69.3878	73.4628
		VV-AA FF-AA	56.0976	54.6875	47.9592	60.1942
		M2	56.0976	42.9688	33.6735	55.9871
	Panel G
					Exp 1	Exp 2	Exp 3	Exp 4
		WT	-	-	6.36943	7.00637	1.92837	29.7362
				+Wnt3a	68.7898	114.65	79.8898	129.257
		DVL tKO	-	-	18.4713	9.55414	7.43802	26.3789
				+Wnt3a	26.7516	38.2166	34.9862	43.4053
			DVL2	-	54.1401	22.9299	68.8705	19.1847
				+Wnt3a	100	100	100	100
			VV-AA FF-AA	-	28.6624	15.2866	34.7107	23.9808
				+Wnt3a	47.7707	71.3376	65.8402	48.6811
			M2	-	23.5669	12.1019	16.2534	18.9448
				+Wnt3a	43.949	39.4904	68.0441	77.458
	Panel H
			Luc activity	Condensates	L. complexes
		DVL2	100	95.75	89.63
		DDEP	48.575	73.7725	44.935
		DDEP-DCD1	44.4	80.56
		DDEP-DLCR1	43.8	74.44
		DDEP-DLCR2	40.3	80.67
		DDEP-DLCR3	81.6	84.67
		DDEP-DLCR4	22.1	37.56	25.4
		DDEP-DCD2	30.15	30.955	38.4
		DDEP FF-AA	37.2	33.4
		DDEP-DCFR	23.85	18.675	24.3
		DDEP-DCFR+CFRAX	47.4	56.8
		1-418	23.2	7.90667	11.58
		1-418+LCR4	25.8	28.3	37.545
		1-418+CD2	49.15	53.2	13.78
		1-418+CD2 FF-AA	36	9.8
		1-418+CFR	43.5	94.2	25.43
