# Supplementary figures and images for: Endogenous oligomer formation underlies DVL2 condensates and promotes Wnt/β-catenin signaling
Source: eLife journal article supplement (doi:10.7554/elife.96841), 2024-05-01

To Panel A

unedited

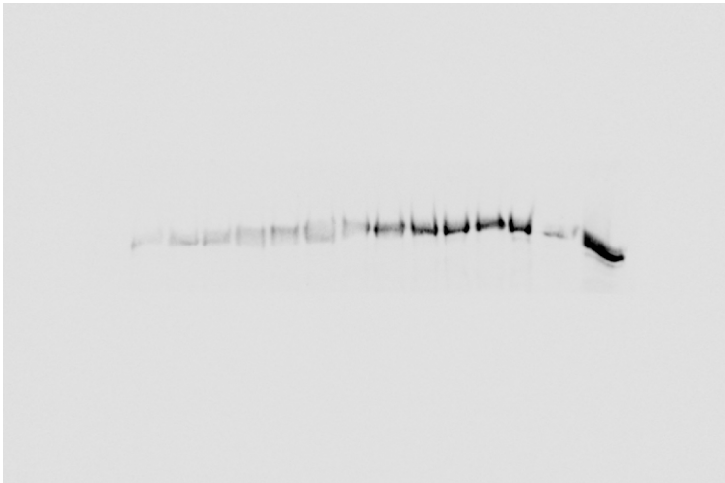

labelled

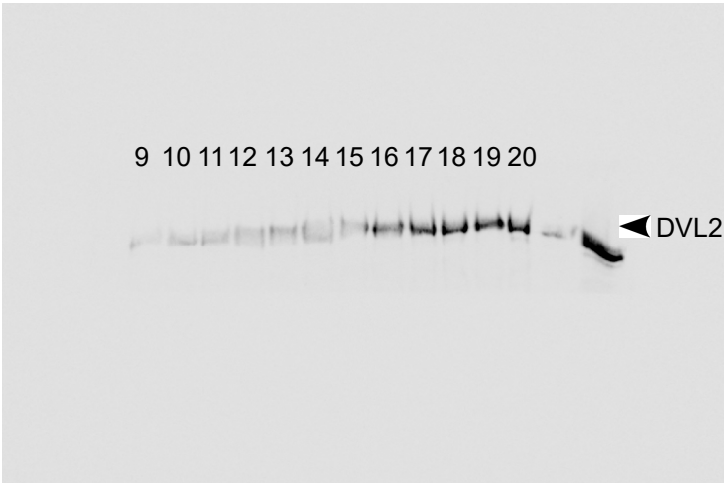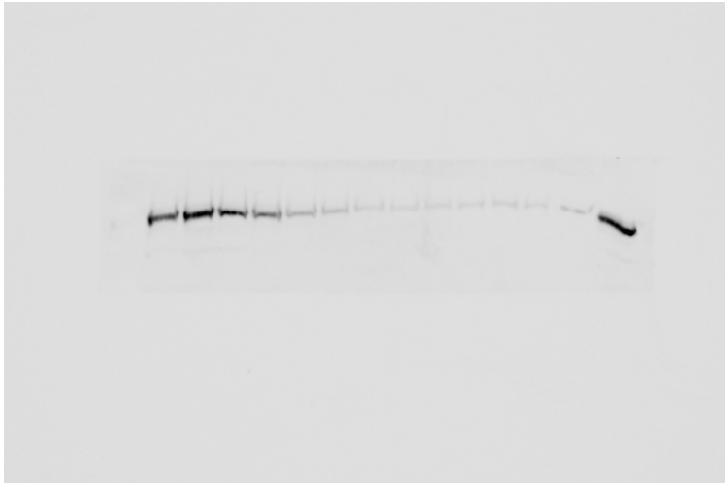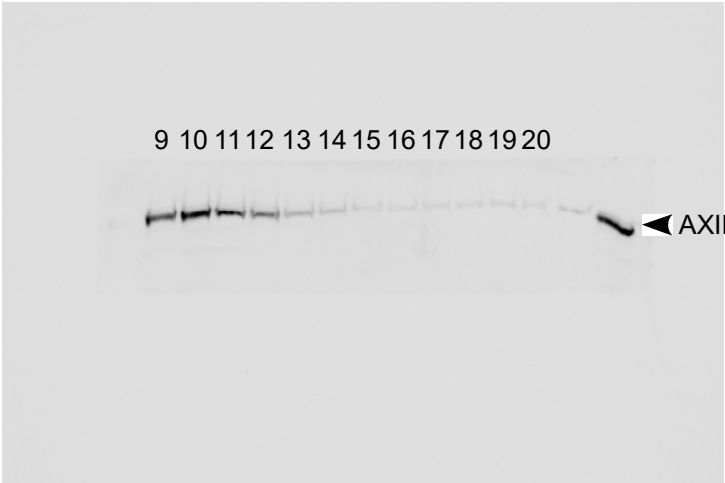

Supplement: fig1-data2 [file elife-96841-fig1-data2-v1.zip]

To Panel B

unedited

labelled

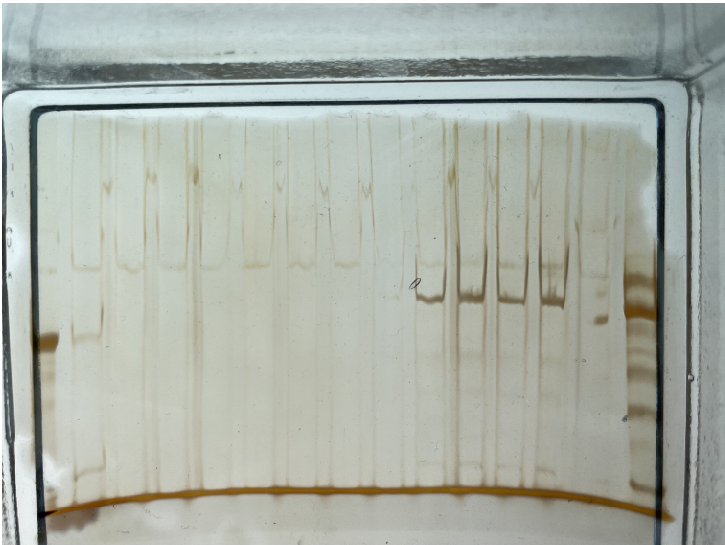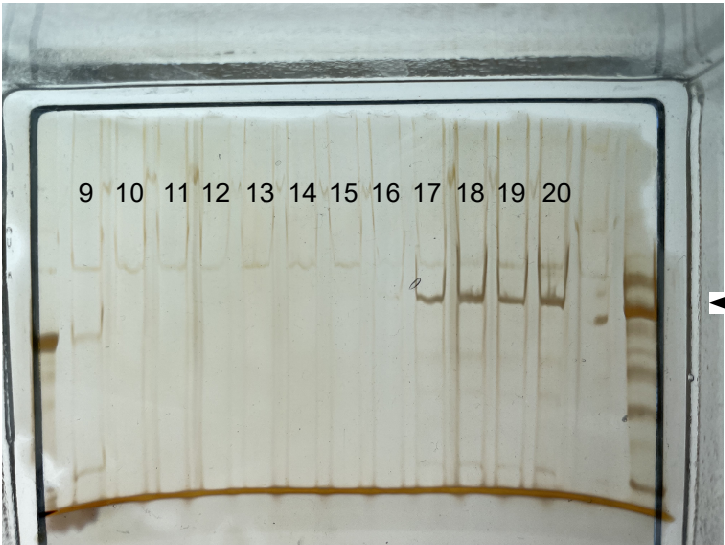

9 10 11 12 13 14 15 16 17 18 19 20

◀ TG

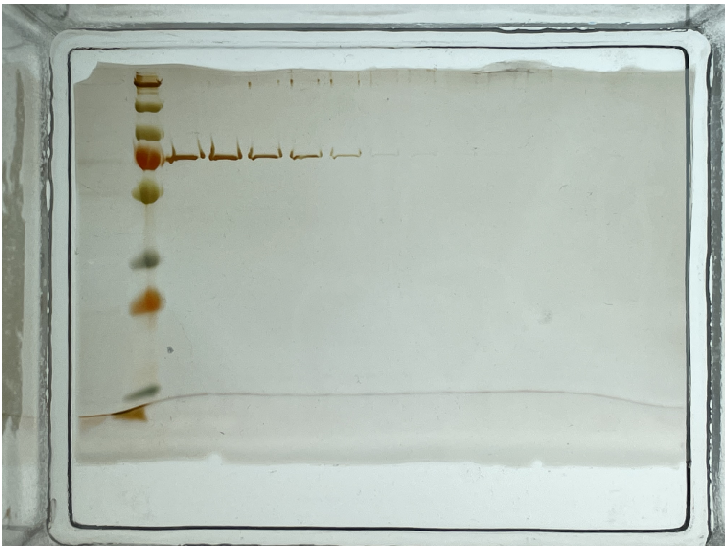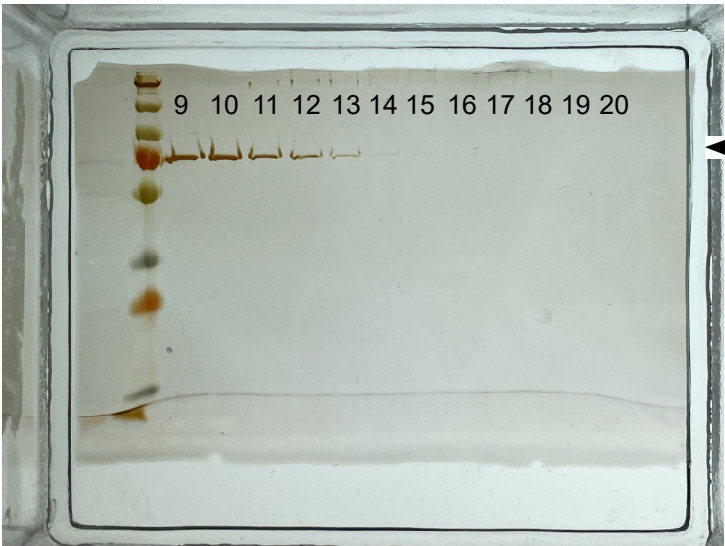

9 10 11 12 13 14 15 16 17 18 19 20

◀ ALB

Supplement: fig1-data2 [file elife-96841-fig1-data2-v1.zip]

To Panel C

unedited

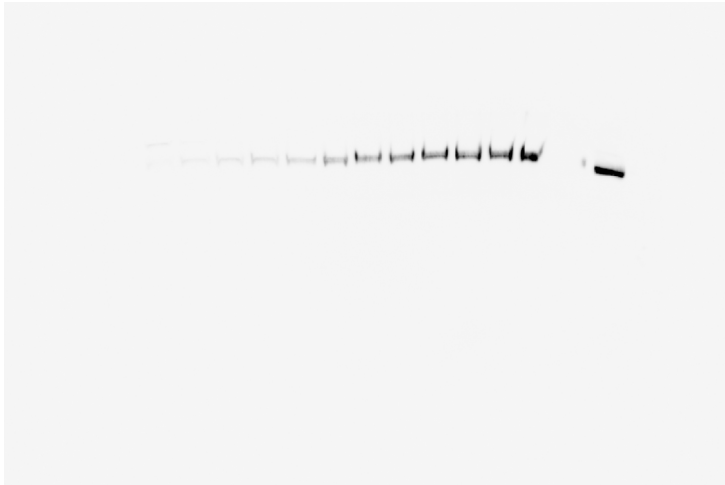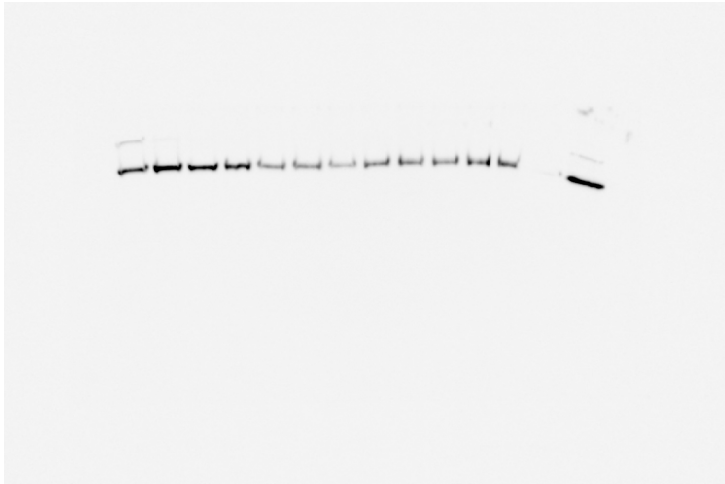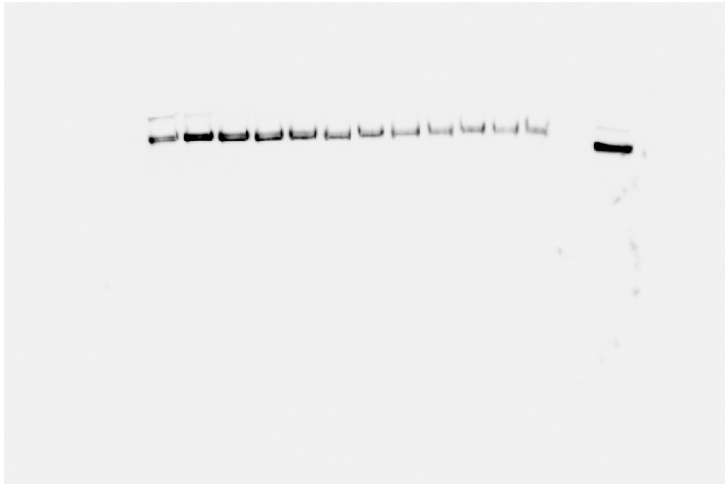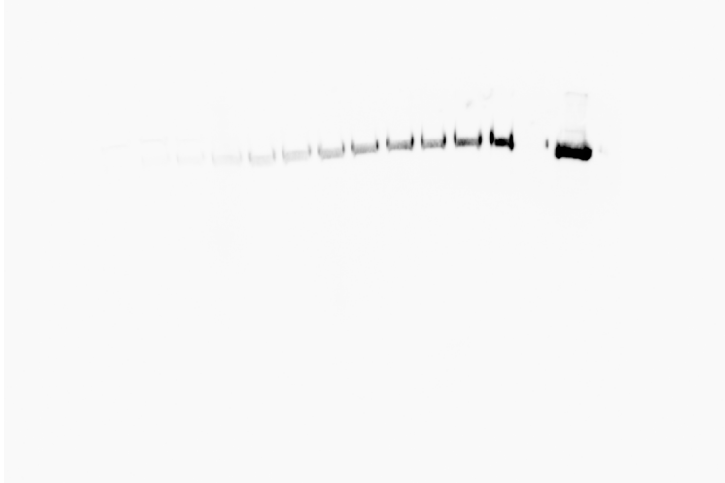

labelled

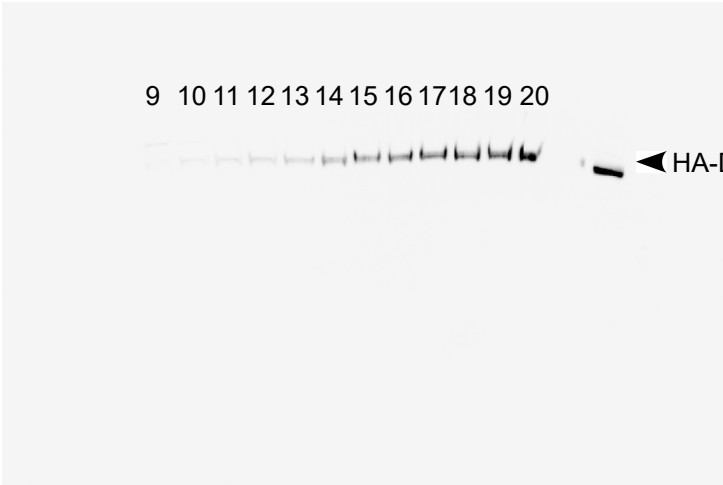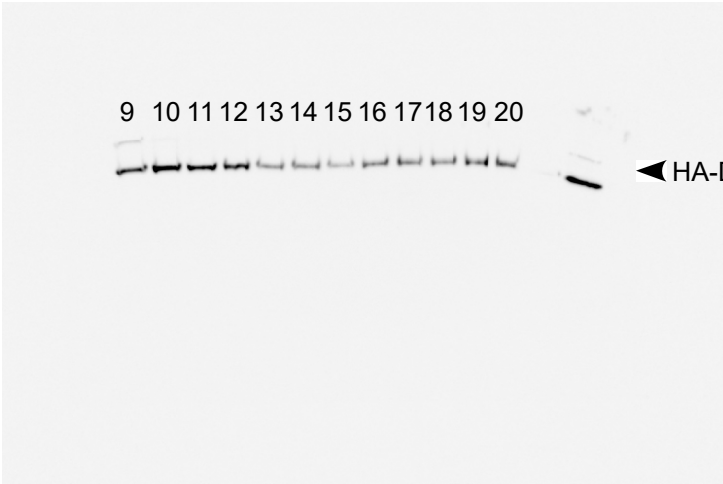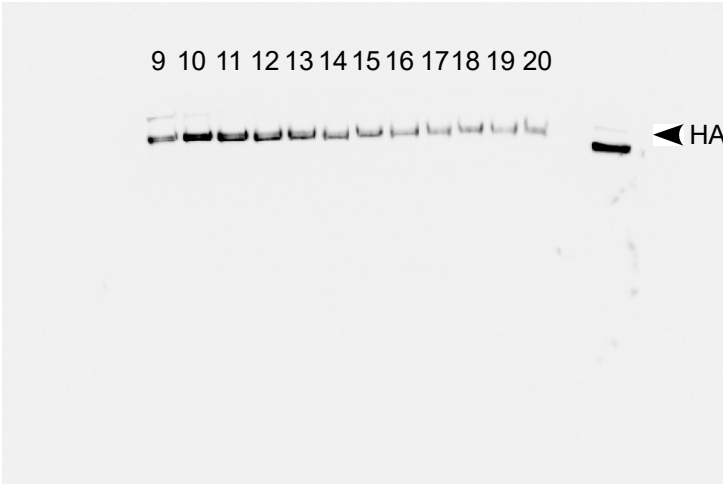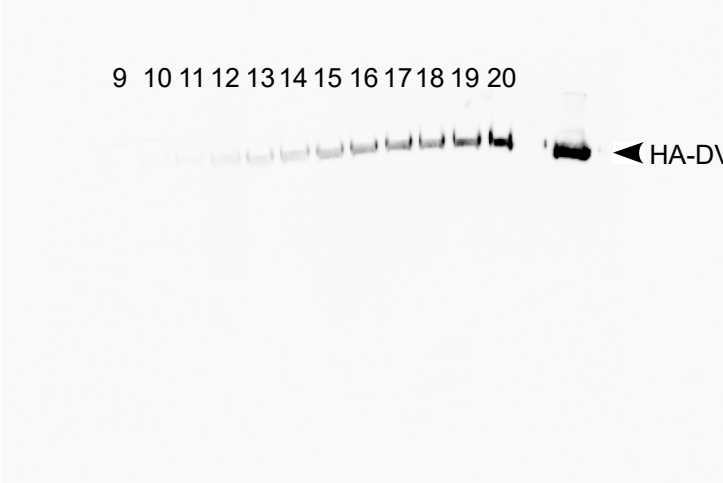

Supplement: fig1-data2 [file elife-96841-fig1-data2-v1.zip]

To Panel B

unedited

labelled

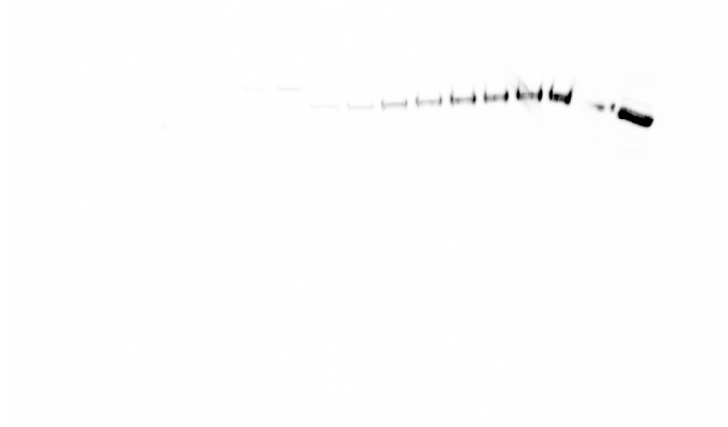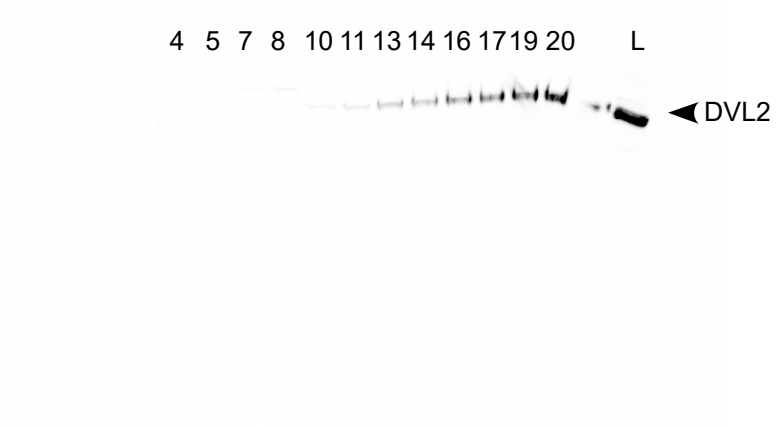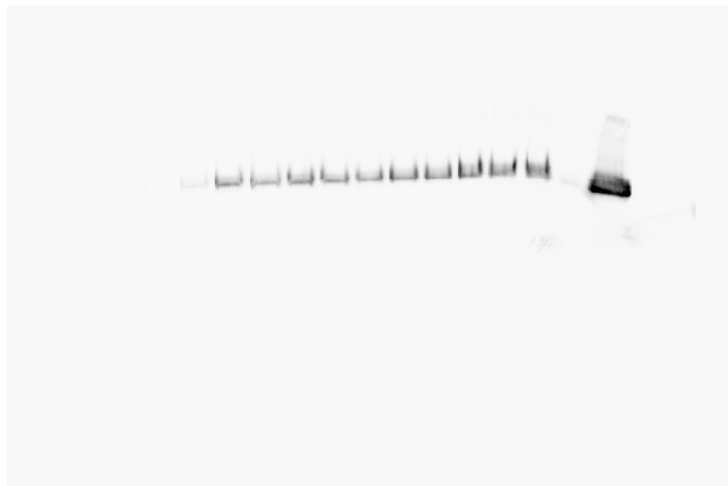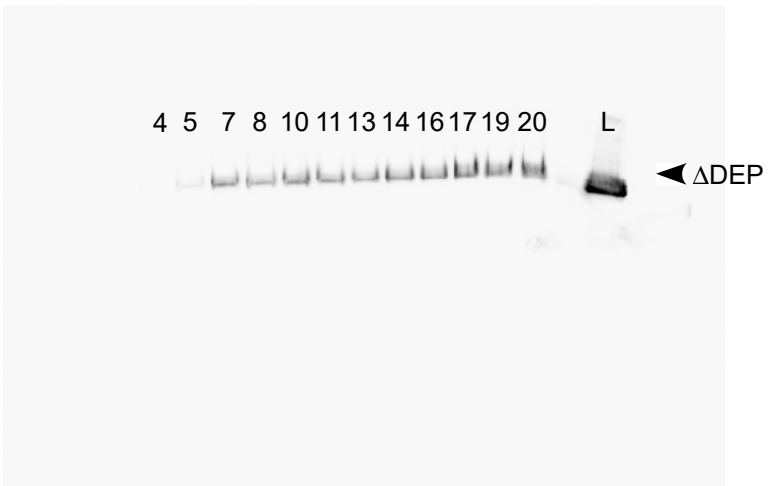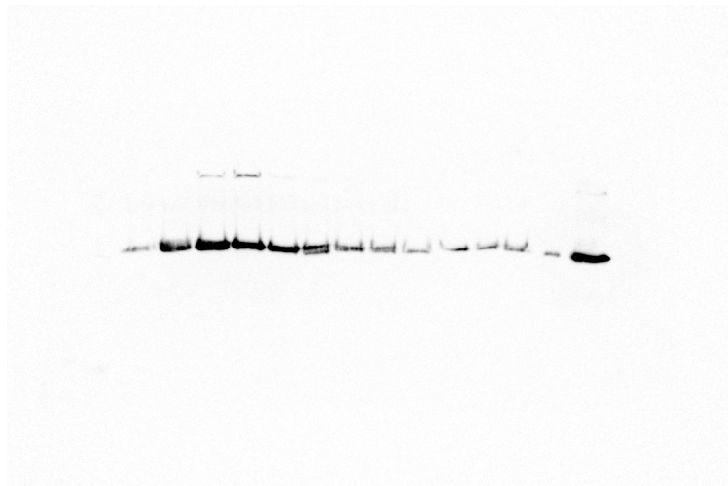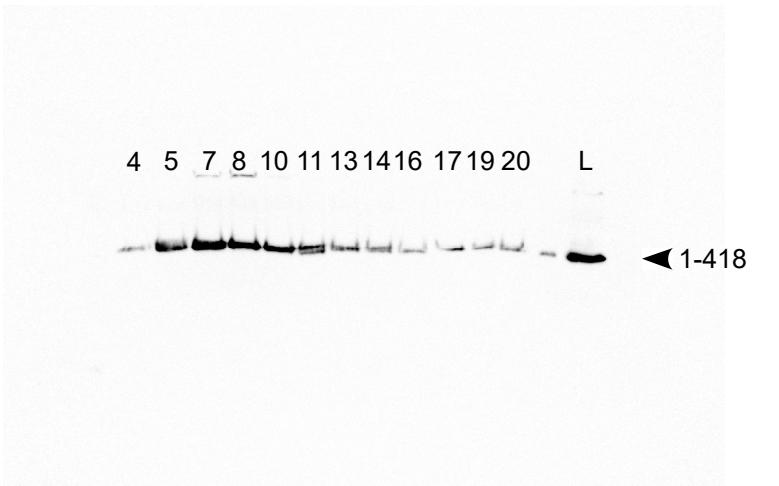

Supplement: fig2-data2 [file elife-96841-fig2-data2-v1.zip]

To Panel E

unedited

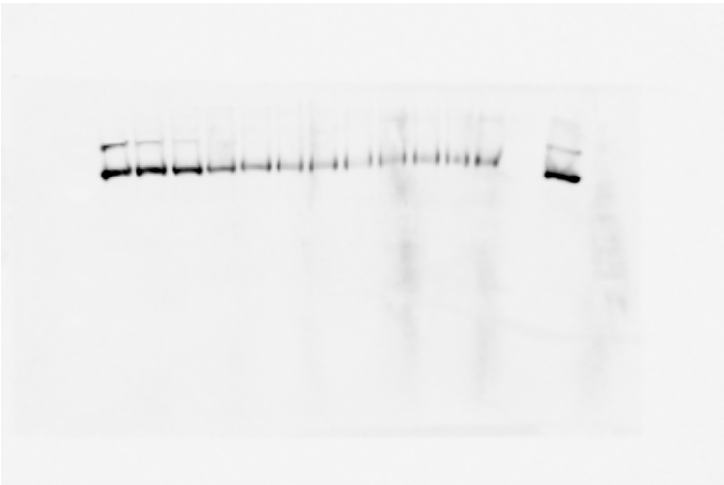

labelled

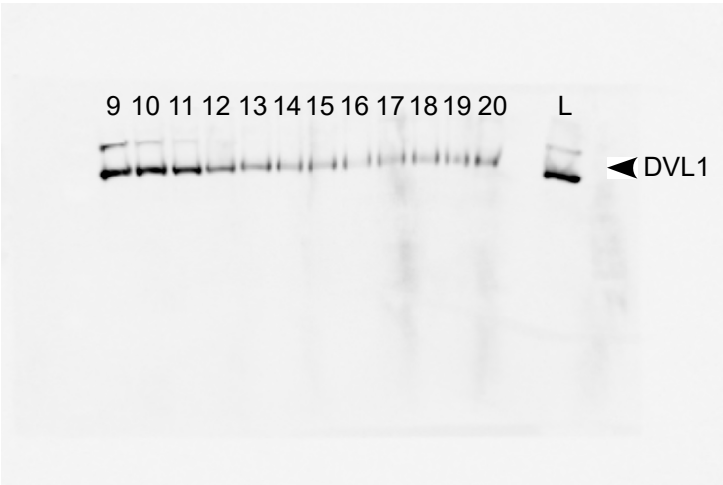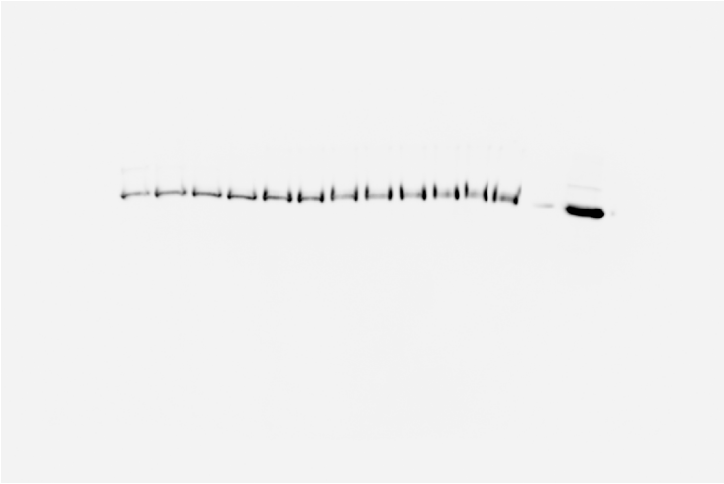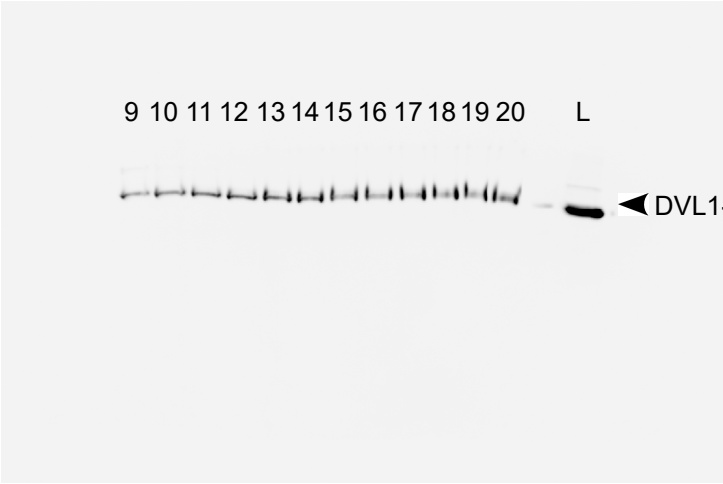

Supplement: fig4-data2 [file elife-96841-fig4-data2-v1.zip]

To Panel C

unedited

labelled

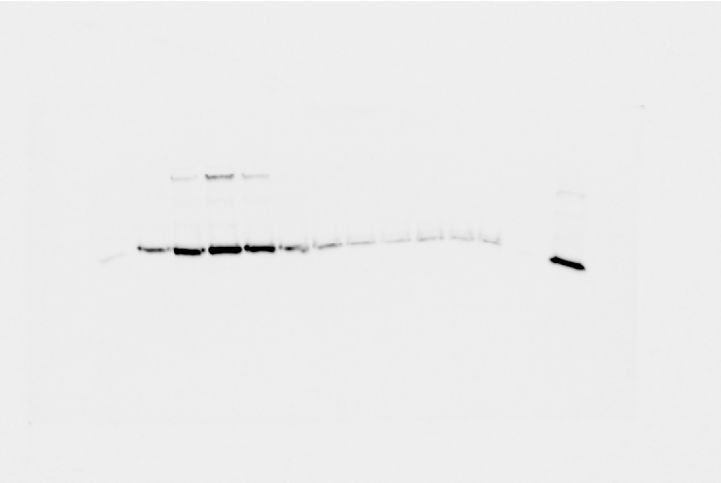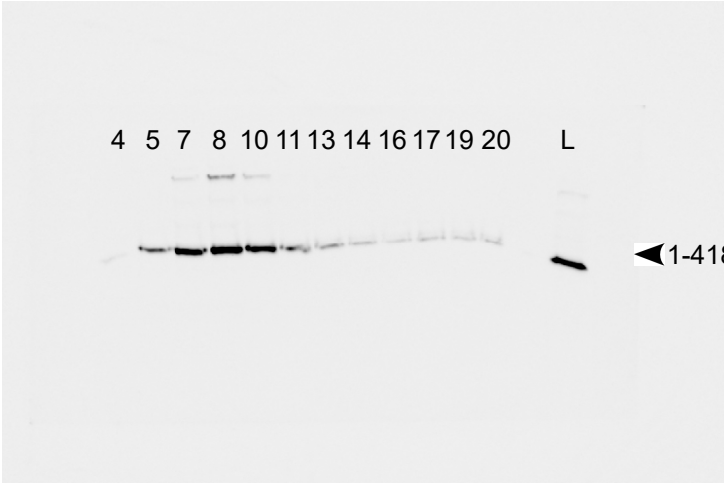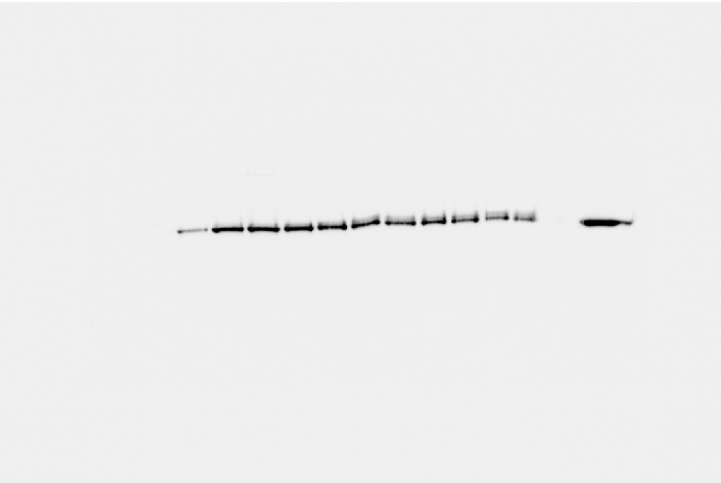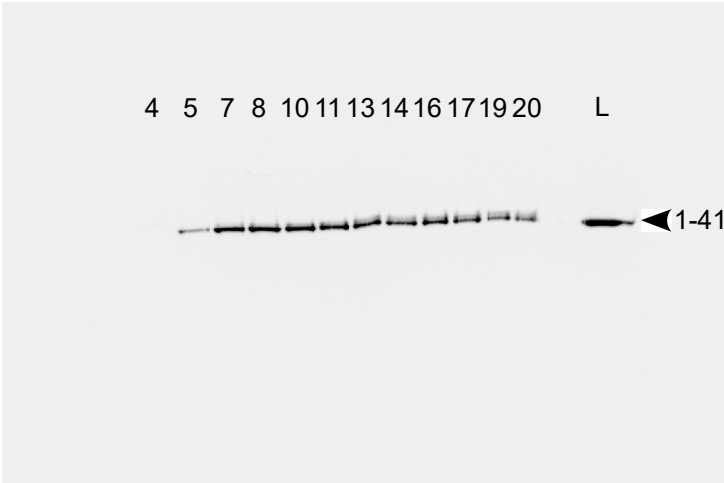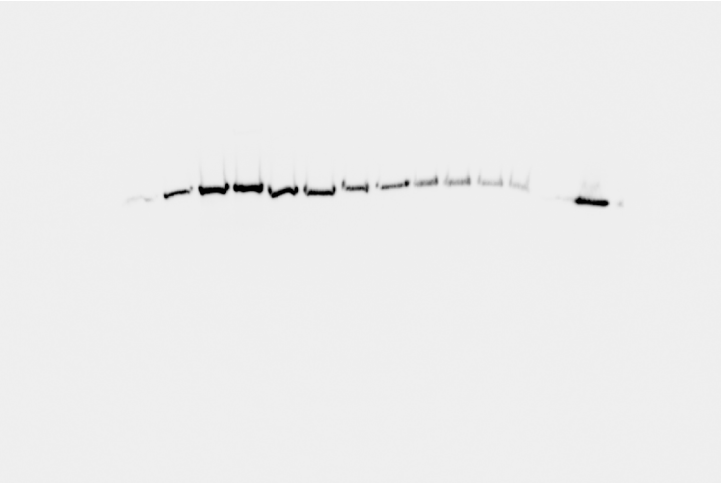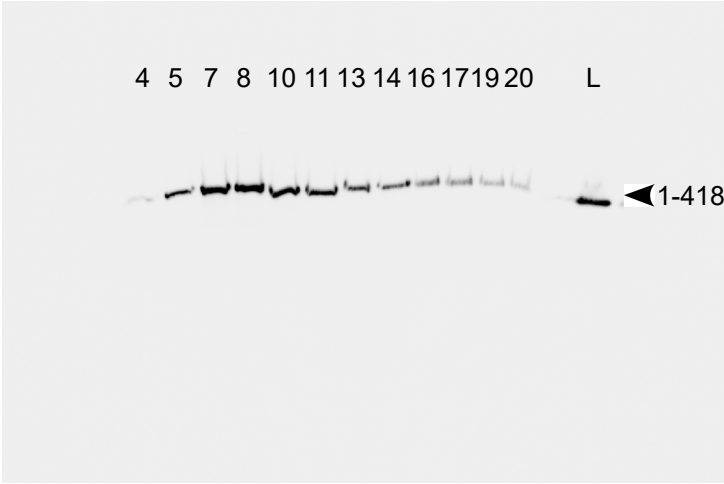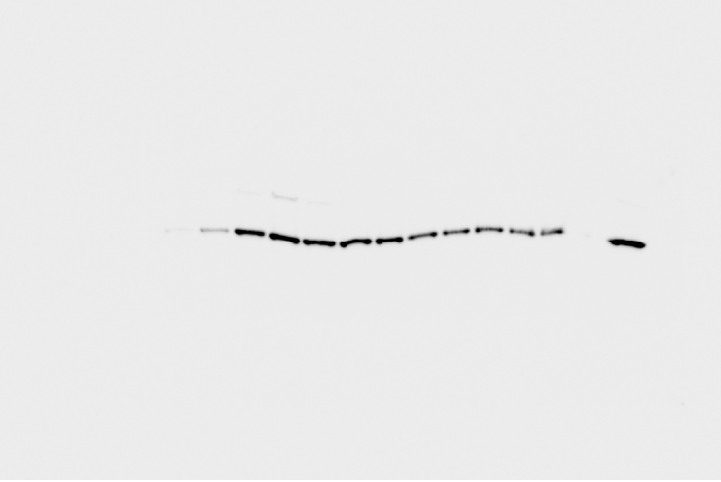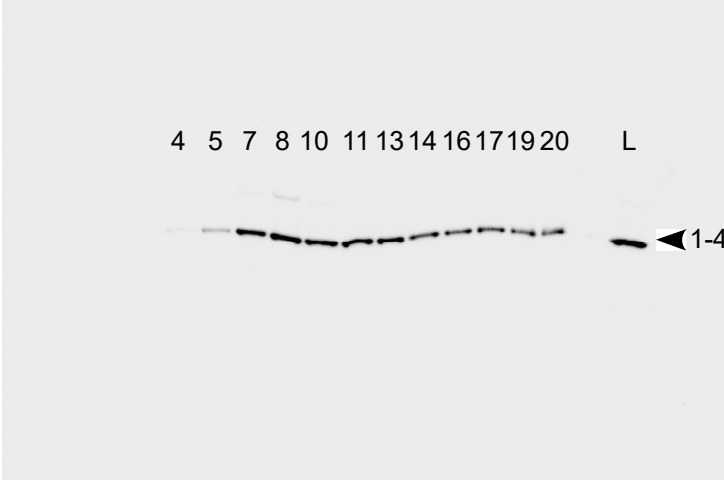

Supplement: fig4-data2 [file elife-96841-fig4-data2-v1.zip]

To Panel A

unedited

labelled

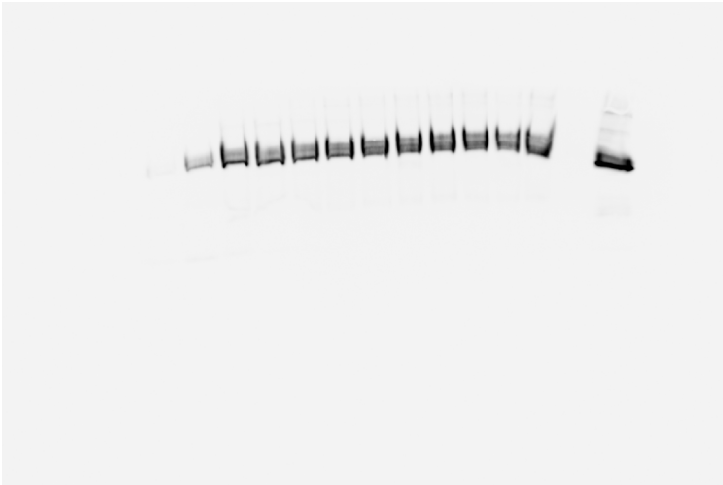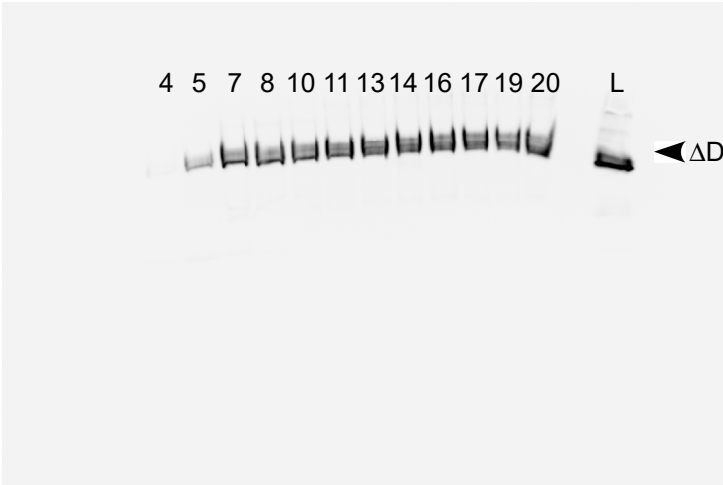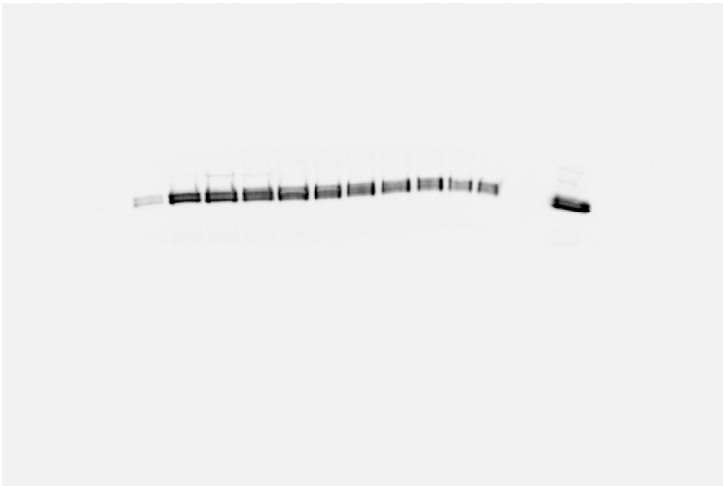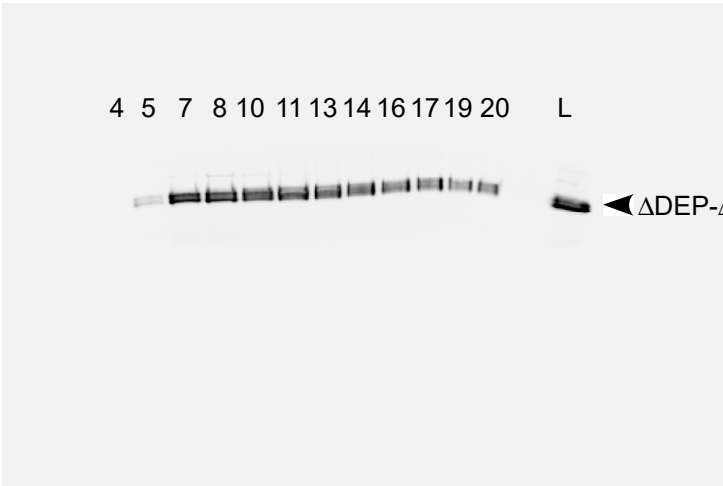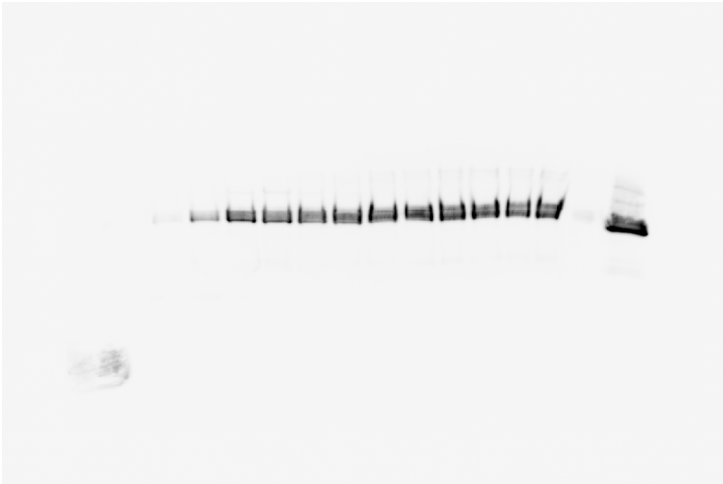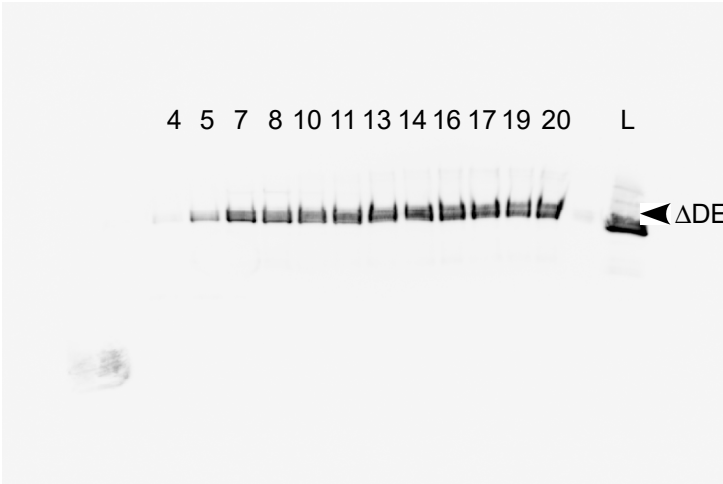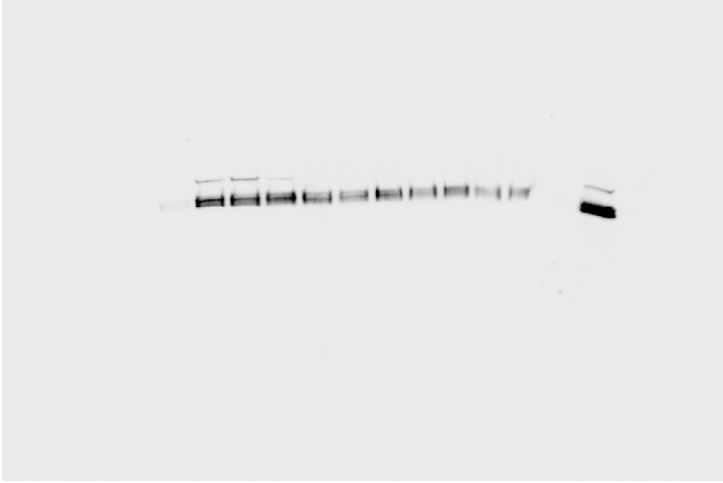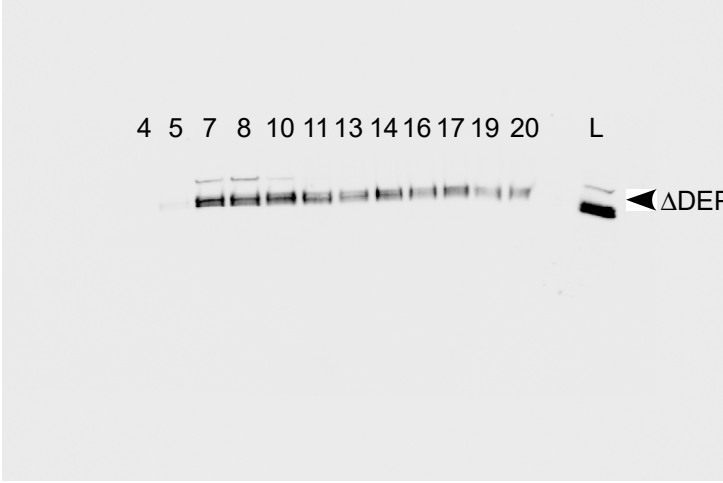

Supplement: fig4-data2 [file elife-96841-fig4-data2-v1.zip]

To Panel A

unedited

labelled

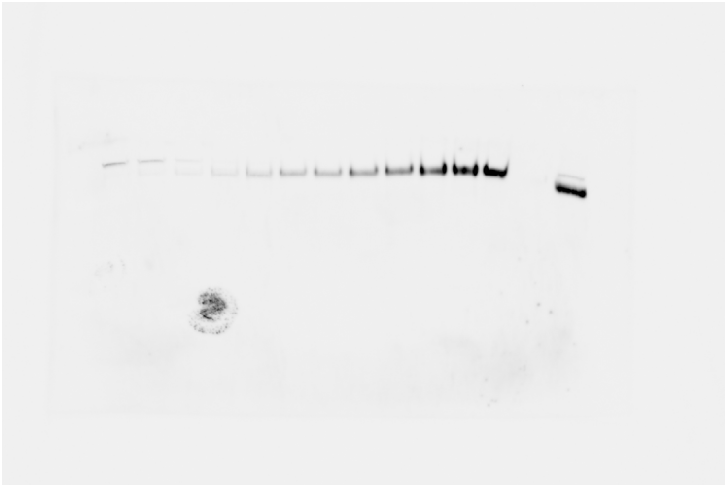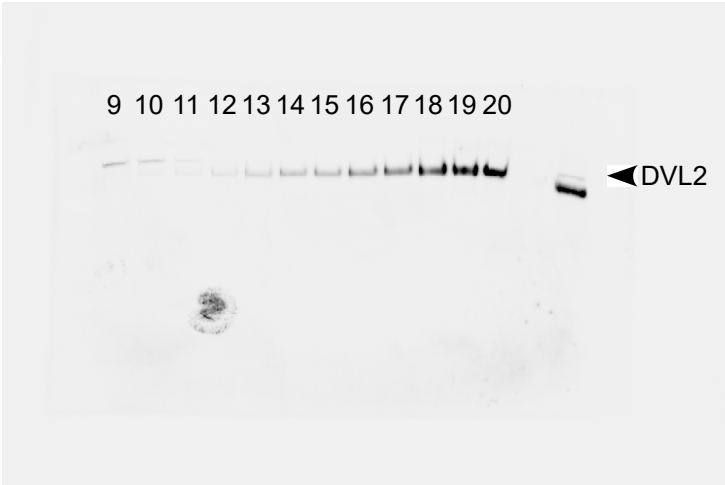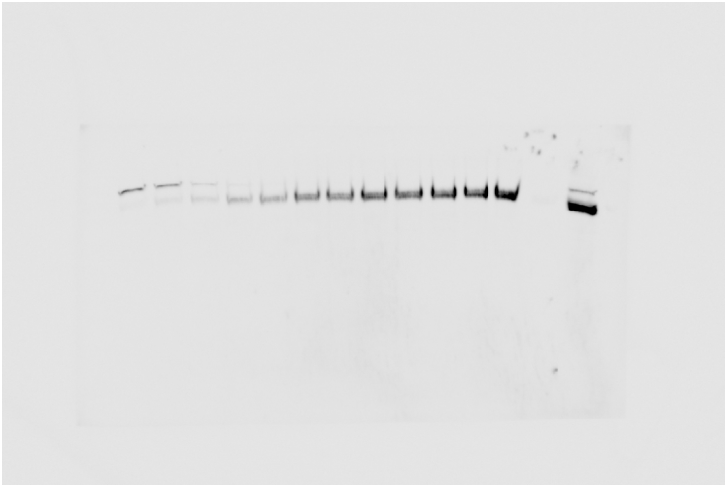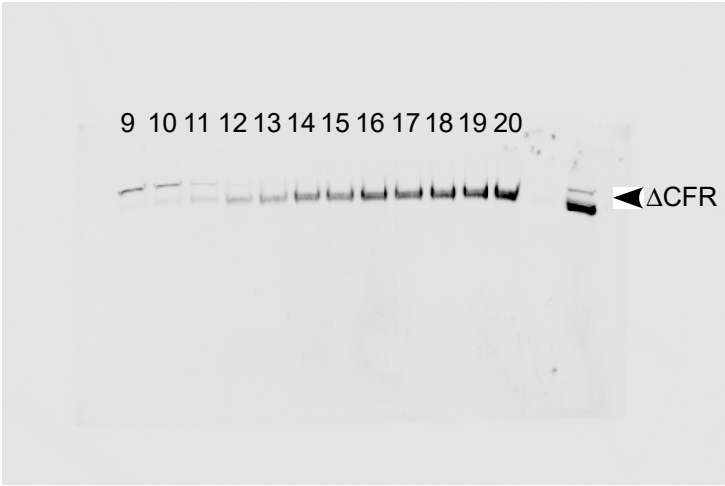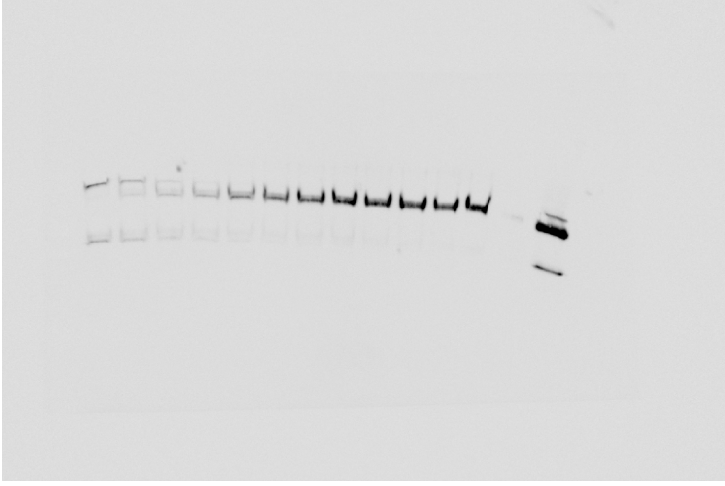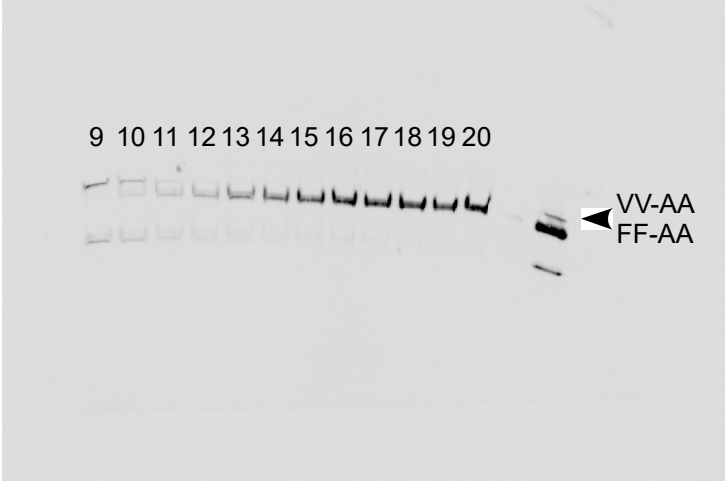

Supplement: fig7-data2 [file elife-96841-fig7-data2-v1.zip]
